# Supplementary material for: Factors associated with neonatal near-miss in selected hospitals of Gamo and Gofa zones, southern Ethiopia: nested case-control study
Source: PubMed Central journal article supplement (PMC6925862; doi:10.1186/s12884-019-2684-x), 2019-12-21
Supplement: 12884_2019_2684_MOESM1_ESM.pdf [file 12884_2019_2684_MOESM1_ESM.pdf]

**English Version Questionnaire**

**Interview and Record Review**

**Identification Number**

| SNo                                                            | Questions                                        | Response                                                                                | Skip |
|----------------------------------------------------------------|--------------------------------------------------|-----------------------------------------------------------------------------------------|------|
| <b>Part I: Identifications</b>                                 |                                                  |                                                                                         |      |
| 101                                                            | Hospital Name                                    | a. AMGH<br>b. Chenchu Primary Hospital<br>c. Sawla General Hospital                     |      |
| 102                                                            | Hospital code                                    | ___/___/___                                                                             |      |
| 103                                                            | Date form filled to start                        | ___/___/___                                                                             |      |
| 104                                                            | Woreda/District                                  | _____                                                                                   |      |
| 105                                                            | Kebele                                           | _____                                                                                   |      |
| 106                                                            | Village                                          | _____                                                                                   |      |
| 107                                                            | Phone number (anyone who are immediate response) |                                                                                         |      |
| 108                                                            | Health Center in the surround                    |                                                                                         |      |
| 109                                                            | Health Post in the surround                      |                                                                                         |      |
| 110                                                            | Health extension worker name and phone number    |                                                                                         |      |
| 111                                                            | Admission date                                   | ___/___/___EC                                                                           |      |
| 112                                                            | Maternity record number/Medical Reg. Number      | _____                                                                                   |      |
| 113                                                            | Admission mode                                   | a. Self-referred<br>b. Referred from another facility                                   |      |
| 114                                                            | Means of transport used                          | a. Ambulance<br>b. Public transport<br>c. Personal vehicle<br>d. Other, specify _____   |      |
| <b>Part II: Socio-demographic and economic characteristics</b> |                                                  |                                                                                         |      |
| 201                                                            | How old are you?                                 | _____ (in completed year)                                                               |      |
| 202                                                            | What is your marital status?                     | a. Married<br>b. Single<br>c. Widowed<br>d. Divorced<br>e. Separated due to work        |      |
| 203                                                            | What is your ethnicity?                          | _____                                                                                   |      |
| 204                                                            | What is mother's educational status?             | a. No formal education<br>b. Primary(1-8)<br>c. Secondary(9-12)<br>d. College and above |      |
| 205                                                            | What is paternal educational status?             | a. No formal education<br>b. Primary (1-8)                                              |      |

|                                                                                                                     |                                                                           |                                                                                              |            |
|---------------------------------------------------------------------------------------------------------------------|---------------------------------------------------------------------------|----------------------------------------------------------------------------------------------|------------|
|                                                                                                                     |                                                                           | c. Secondary (9-12)<br>d. College and above                                                  |            |
| 206                                                                                                                 | What is your religion?                                                    | a. Orthodox<br>b. Catholic<br>c. Protestant<br>d. Muslim<br>e. Traditional                   |            |
| 207                                                                                                                 | What is the occupation of the mother?                                     | a. House wife<br>b. Merchant<br>c. Government employer<br>d. Daily laborer                   |            |
| 208                                                                                                                 | What is the occupation of the father?                                     | a. Farmer<br>b. Merchant<br>c. Government employer<br>d. Wavier<br>e. Daily laborer          |            |
| 209                                                                                                                 | Where is the place of residence?                                          | a. Urban<br>b. Rural                                                                         |            |
| 210                                                                                                                 | How much is your family average income per month?                         | _____ (ETB)                                                                                  |            |
| <b>Part III: Maternal Factors related questions (Record review if it is available, if not interview the mother)</b> |                                                                           |                                                                                              |            |
| 301                                                                                                                 | Number of pregnancies (gravidity)?                                        | _____ (in number) If primi →                                                                 | <b>401</b> |
| 302                                                                                                                 | Number of birth orders (parity)?                                          | _____ (in number)                                                                            |            |
| 303                                                                                                                 | Do you pervious history of still birth?                                   | a. Yes<br>b. No                                                                              |            |
| 304                                                                                                                 | Do you pervious history of abortion?                                      | a. Yes<br>b. No                                                                              |            |
| 305                                                                                                                 | The duration between the current birth and the preceding birth in months? | _____ (in months)                                                                            |            |
| 306                                                                                                                 | Do you have pervious history of neonatal death?                           | a. Yes<br>b. No                                                                              |            |
| <b>Part IV: Maternal and child health care questions (similar with part III)</b>                                    |                                                                           |                                                                                              |            |
| 401                                                                                                                 | Did the woman receive antenatal care?                                     | a. Yes<br>b. No →                                                                            | <b>403</b> |
| 402                                                                                                                 | If yes, number of visits                                                  | _____                                                                                        |            |
| 403                                                                                                                 | Do you have immediate PNC visit?                                          | a. Yes<br>b. No                                                                              |            |
| <b>Part V: Obstetric related questions (Record review/interview)</b>                                                |                                                                           |                                                                                              |            |
| 501                                                                                                                 | Date of delivery or end of pregnancy                                      | ___/___/___                                                                                  |            |
| 502                                                                                                                 | Mode of delivery                                                          | a. Spontaneous vaginal delivery<br>b. Instrumental assisted delivery<br>c. Caesarean section |            |

|     |                             |                                                                                                                                                                                                                                                                                                          |       |
|-----|-----------------------------|----------------------------------------------------------------------------------------------------------------------------------------------------------------------------------------------------------------------------------------------------------------------------------------------------------|-------|
| 503 | Hemorrhage                  | a. Yes<br>b. No                                                                                                                                                                                                                                                                                          | → 505 |
| 504 | If, yes                     | a. Placenta praevia<br>b. Placenta accreta/increta/percreta<br>c. Retro-placental haematoma<br>d. Other first trimester hemorrhage<br>e. Hemorrhage during delivery (no other specification)<br>f. Uterine rupture<br>g. Postpartum hemorrhage (no other specification)<br>h. Other obstetric hemorrhage |       |
| 505 | Premature rupture of member | a. Yes<br>b. No                                                                                                                                                                                                                                                                                          |       |
| 506 | Hypertension                | a. Yes<br>b. No                                                                                                                                                                                                                                                                                          | → 508 |
| 507 | If, Yes                     | a. Pre-eclampsia<br>b. Eclampsia<br>c. HELLP<br>d. Chronic hypertension<br>e. Gestational hypertension                                                                                                                                                                                                   |       |
| 508 | Anaemia (Hb < 11g/dl)       | a. Yes<br>b. No                                                                                                                                                                                                                                                                                          | → 510 |
| 509 | If, Yes                     |                                                                                                                                                                                                                                                                                                          |       |
|     | a. Haemoglobin level (g/dl) | _____                                                                                                                                                                                                                                                                                                    |       |
|     | b. Unknown                  |                                                                                                                                                                                                                                                                                                          |       |
| 510 | Infection                   | a. Yes<br>b. No                                                                                                                                                                                                                                                                                          | → 512 |
| 511 | If, Yes                     | a. Unspecified infection<br>b. Puerperal endometritis<br>c. Pyelonephritis<br>d. Septicaemia<br>e. Peritonitis<br>f. Parietal suppuration<br>g. Malaria<br>h. Syphilis<br>i. Other systemic infection                                                                                                    |       |
| 512 | Dystocia                    | a. Yes<br>b. No                                                                                                                                                                                                                                                                                          | → 514 |
| 513 | If, Yes                     | a. Uterine pre-rupture<br>b. Prolonged labour<br>c. Foeto-pelvic disproportion                                                                                                                                                                                                                           |       |
| 514 | Other pathologies           | a. Yes<br>b. No                                                                                                                                                                                                                                                                                          | → 516 |

|     |                                                            |                                                                                                                                                                    |  |
|-----|------------------------------------------------------------|--------------------------------------------------------------------------------------------------------------------------------------------------------------------|--|
| 515 | If, Yes                                                    | a. HIV/AIDS<br>b. Embolic diseases<br>(thrombosis/amniotic fluid or<br>gaseous embolism<br>c. Heart disease<br>d. Sickle-cell disease<br>e. Other (specify: _____) |  |
| 516 | <b>Newborn</b>                                             |                                                                                                                                                                    |  |
|     | <b>A. Presentation</b>                                     | a. Cephalic<br>b. Breech<br>c. Transverse/face/brow<br>d. Other, specify _____                                                                                     |  |
|     | <b>B. Sex</b>                                              | a. Male<br>b. Female<br>c. Unknown                                                                                                                                 |  |
|     | <b>C. Birth trauma</b>                                     | a. Yes<br>b. No                                                                                                                                                    |  |
|     | <b>D. If the above response is yes</b>                     | Specify, _____                                                                                                                                                     |  |
|     | <b>E. Baby referred to another facility?</b>               | a. Yes<br>b. No                                                                                                                                                    |  |
|     | <b>F. Admitted to special care or intensive care unit?</b> | a. Yes<br>b. No                                                                                                                                                    |  |

**Identification criteria for Neonatal near miss**

*Put “√” for the management criteria on each phase if it is ok in the box*

| <b>Part VI: Neonatal Near-Miss Criteria's</b> |                                                                |                 |                               |
|-----------------------------------------------|----------------------------------------------------------------|-----------------|-------------------------------|
| <b>Pragmatic Markers</b>                      |                                                                |                 |                               |
| 601                                           | Gestational age                                                | _____ (in week) |                               |
| 602                                           | Birth weight                                                   | _____ (g)       |                               |
| 603                                           | Apgar score at 5 <sup>th</sup> min                             | _____           |                               |
| <b>Management Severity Criteria's</b>         |                                                                |                 |                               |
| 604                                           | Use of intravenous antibiotics                                 |                 |                               |
| 605                                           | Nasal CPAP                                                     |                 |                               |
| 606                                           | Any intubation                                                 |                 |                               |
| 607                                           | Use of phototherapy in the first 24 hour                       |                 |                               |
| 608                                           | Cardio pulmonary resuscitation                                 |                 |                               |
| 609                                           | Use of any vasoactive drug                                     |                 |                               |
| 610                                           | Use of anticonvulsants                                         |                 |                               |
| 611                                           | Use of surfactant                                              |                 |                               |
| 612                                           | Transfusion of blood derivatives                               |                 |                               |
| 613                                           | Use of corticosteroid for treatment of refractory hypoglycemia |                 |                               |
| 614                                           | Any surgical procedure                                         |                 |                               |
| 615                                           | Use of antenatal steroid                                       |                 |                               |
| 616                                           | Parenteral nutrition                                           |                 |                               |
| 617                                           | Congenital malformation – ICD-10                               |                 |                               |
| 618                                           | Admission to NICU                                              |                 |                               |
| <b>Is the newborn considered near-miss?</b>   |                                                                |                 | <b>a. Yes</b><br><b>b. No</b> |

*Thanks!*
